# Supplementary material for: Legacy effects of historical grazing alter leaf stomatal characteristics in progeny plants
Source: PeerJ. 2020 Jun 17;8:e9266. doi: 10.7717/peerj.9266 (PMC7305771; doi:10.7717/peerj.9266)
Supplement: Supplemental Information 1 [file peerj-08-9266-s001.xlsx]

## Sheet: Morphological traits
The morphological traits after about 7 weeks of culturing							Plant height (cm)									Growth rate of plant height (cm/d)
Traits Replicates	Height（cm）	Aboveground biomass（g）	Leaf length（cm）	Leaf width (cm)	Leaf area (cm2)		Time/d Replicates	7/d	14/d	23/d	31/d	37/d	44/d	51/d		Time/d Replicates	7-14	14-23	23-31	31-37	37-44	44-51
NG-1	34.85	0.34	16.6333	4.10333	4.47051		NG-1	5.5	14	25.25	32.9	33.5	33.75	34.85		NG-1	1.21429	1.25	0.95625	0.1	0.0357143	0.157143
NG-2	29.35	0.28	18.45	4.035	4.8762		NG-2	8.5	16.75	23.5	26.5	26.75	28.75	29.35		NG-2	1.17857	0.75	0.375	0.0416667	0.285714	0.0857143
NG-3	33.6	0.33	20.4	2.81667	3.76363		NG-3	7.66667	16.8333	25	31.9333	33.3333	33.5	33.6		NG-3	1.30952	0.907407	0.866667	0.233333	0.0238095	0.0142857
NG-4	34.77	0.35	20.35	5.295	7.05784		NG-4	6.66667	17	21.3333	32.4	34.1667	34.3333	34.7667		NG-4	1.47619	0.481481	1.38333	0.294444	0.0238095	0.0619048
NG-5	32.93	0.28	18.1667	5.63333	6.7032		NG-5	11	20.6667	26.3333	31.1	32	32.8333	32.9333		NG-5	1.38095	0.62963	0.595833	0.15	0.119048	0.0142857
NG-6	32.96	0.31	25	5.28	8.646		NG-6									NG-6
NG-7	32.2333	0.29	19.6667	3.99667	5.14837		NG-7	8.5	23.3333	27.3333	28.2	29.6667	30	32.2333		NG-7	2.11905	0.444444	0.108333	0.244444	0.047619	0.319048
GZ-1	28.5	0.3	17.65	4.715	5.45089		GZ-1	7	13.25	18	21.75	24.5	26	28.5		GZ-1	0.892857	0.527778	0.46875	0.458333	0.214286	0.357143
GZ-2	24	0.26	16.3333	4.66667	4.99256		GZ-2	11.5	22	23	23	23	23	24		GZ-2	1.5	0.111111	0	0	0	0.142857
GZ-3	26.17	0.27	16.6333	3.73	4.06377		GZ-3	7.66667	17.8333	19.6667	24.3333	24.3333	26	26.1667		GZ-3	1.45238	0.203704	0.583333	0	0.238095	0.0238095
GZ-4	26.75	0.29	21.1667	4.44667	6.16493		GZ-4	6.5	16.5	19	20.75	23.5	26.75	26.75		GZ-4	1.42857	0.277778	0.21875	0.458333	0.464286	0
GZ-5	22	0.25	14.3667	2.96333	2.78855		GZ-5	5.33333	13	17.6667	18.7	19.6667	22	22		GZ-5	1.09524	0.518519	0.129167	0.161111	0.333333	0
GZ-6	26.8333	0.28	16.8333	4.18333	4.61247		GZ-6	7.5	16.3333	22	23.8667	25.3333	26.0667	26.8333		GZ-6	1.2619	0.62963	0.233333	0.244444	0.104762	0.109524
GZ-7	22.35	0.27	14.3333	3.42333	3.21394		GZ-7	5.5	10.5	16.25	18.15	18.5	21.2	22.35		GZ-7	0.714286	0.638889	0.2375	0.0583333	0.385714	0.164286
Note：NG, ungrazed; GZ, grazed

## Sheet: Gas exchange parameters
Gas exchange parameters
	PN (mmol m-2 s-1)	gs (mol H2O m-2 s-1)	Ci (μmolCO2 mol air-1)	E (mmol m-2 s-1)	WUE(mmol m-2 s-1)
NG-1-1	26.4842	0.215	173.018	9.19207	2.8812
NG-1-2	33.905	0.324	201.845	13.9966	2.42237
NG-1-3	32.3393	0.308	200.938	12.37	2.61433
NG-2-2	28.3006		105.128	7.43141	3.80824
NG-2-3	24.4376	0.294	96.1073	6.32713	3.86234
NG-3-2	37.1993	0.399	216.926	16.406	2.26742
NG-3-3	30.6636	0.316	211.723	13.4225	2.28449
NG-4-1	34.5979	0.4	219.426	15.7943	2.19053
NG-4-3	28.3012	0.38	241.827	14.8031	1.91184
NG-5-1	12.2497		291.284	1.25668	9.7477
NG-5-2	13.3802	0.187	288.068	1.26483	10.5787
NG-5-3	7.10289	0.193	346.068	1.17731	6.03315
NG-6-1	17.2024	0.23	285.098	1.8593	9.25207
NG-6-2	14.5737	0.357	340.853	2.46445	5.91356
NG-7-1	14.7839	0.347	335.387	3.92287	3.76864
NG-7-2	16.0176	0.232	295.204	2.46086	6.50897
NG-7-3	17.8765	0.234	281.697	2.22067	8.05005
GZ-1-1	25.0171	0.138	284.584	6.24874	4.00354
GZ-1-2	7.79229	0.109	258.809	5.01065	1.55515
GZ-1-3	18.3229	0.311	276.834	12.4836	1.46776
GZ-2-1	20.3015	0.233	298.933	18.7604	1.08215
GZ-2-2	18.9753	0.345	282.086	14.8856	1.27474
GZ-2-3	19.3994	0.342	279.425	13.2673	1.46219
GZ-3-1	10.5892	0.152	260.043	6.83989	1.54816
GZ-3-2	14.5648	0.27	284.811	11.4065	1.27689
GZ-3-3	17.944	0.314	277.677	12.7512	1.40724
GZ-4-1	20.3664		294.823	18.31	1.11231
GZ-4-2	11.2969	0.186	273.363	8.20423	1.37697
GZ-4-3	14.4929	0.241	273.974	10.6173	1.36502
GZ-5-2	12.6669	0.256	326.576	1.73211	1.578
GZ-6-3	8.45696	0.142	312.239	0.923405	1.578
GZ-7-1	9.20493	0.224	284.584	1.30556	1.578
Note：NG, ungrazed; GZ, grazed. Outliers are where the data is not filled in.

## Sheet: Stomatal traits
		The top of leaf surfaces			The middle of leaf surfaces			The tail of leaf surfaces
		Density(mm-2)	Length(µm)	Width(µm)	Density(mm-2)	Length(µm)	Width(µm)	Density(mm-2)	Length(µm)	Width(µm)
The adaxial leaf surfaces of ungrazed materials	NG-1	141.667	39.1447	18.8381	158.333	31.6753	16.3061	120.833	42.4363	18.8887
	NG-2	116.667	39.3726	17.2176	137.5	39.6764	15.7744	66.6667	39.2207	20.4586
	NG-3	112.5	31.7006	18.5089	150	39.2207	16.9644	66.6667	45.2468	23.5729
	NG-4	125	43.7023	18.0278	162.5	35.9038	15.116	95.8333	44.2594	21.3954
	NG-5	141.667	33.9541	17.9266	141.667	36.3848	17.3948	100	44.7911	17.8
	NG-6		50.3108	21.8005	95.8333	39.6005	20.5345	58.3333	42.5376	19.8762
	NG-7	91.6667	48.2346	20.5345	95.8333	47.4497	20.0534	66.6667	43.7783	22.0284
	NG-8	120.833	42.5882	21.3701	120.833	38.8156	23.5476	70.8333	41.1703	17.724
	NG-9		38.056	23.7248	87.5	48.5891	19.8762	62.5	43.3478	19.4711
	NG-10	91.6667	41.5248	18.7621	91.6667	48.741	19.066	83.3333	41.0437	17.3948
	NG-11	141.667	40.5373	22.9652	120.833	41.778	23.2944	66.6667	42.88	20.69
	NG-12	104.167	41.6008	21.5726	95.8333	44.7658	19.1166	91.6667	41.9
	NG-13	104.167	40.2841	20.2054	120.833	36.4608	20.3826	66.6667	44.06	19.74
	NG-14	95.8333	39.4739	19.9775	100	36.4861	19.1419	108.333	45.32	18.14
	NG-15	129.167	40.1322	21.6992	125	41.8793	21.446	91.6667	43.24	21.14
The abaxial leaf surfaces of ungrazed materials	NG-1		37.8534	20.7118	26	108.333	45.4494	23.345	38.9422	24.054
	NG-2		40.0309	18.2557	29	120.833	40.4867	23.0665	42.0059	22.5854
	NG-3	116.667	35.9797	20.4839	32	133.333	41.6514	22.3576	39.7777	25.8264
	NG-4	112.5	42.5123	23.1172	38	158.333	38.4358	23.1172	37.5749	23.7755
	NG-5	116.667	34.9163	20.18	27	112.5	36.8406	21.0916	47.6522	24.3072
	NG-6	75	44.4619	21.8005	22	91.6667	45.6013	22.0284	45.0443	23.6742
	NG-7	91.6667	47.4244	22.6867	23	95.8333	45.2468	26.5354	35.5493	20.7877
	NG-8	79.1667	43.8542	21.1928	19	79.1667	42.2844	20.6864	43.9555	23.4463
	NG-9	95.8333	48.6397	21.8258	19	79.1667	41.3729	23.2438	38.5117	23.9527
	NG-10	79.1667	47.5763	20.9396	13		44.0821	25.6745	37.9294	24.2819
	NG-11	87.5	42.6389	18.4583	24	100	39.322	24.4591	45.5	23.1678
	NG-12	95.8333	40.1575	20.18	33	137.5	44.234	21.9018	47.0952	22.8133
	NG-13	83.3333	44.5126	17.2936	36	150	40.0816	21.6233	48.2346	23.8768
	NG-14	87.5	38.613	21.4714	26	108.333	39.17	24.2566	45.9558	26.2568
	NG-15	79.1667	42.5376	18.7621	25	104.167	42.2084	23.2184	41.069	26.029
The adaxial leaf surfaces of grazed materials	GZ-1	108.333	43.84	21.11	129.167	41.83	20.58	137.5	46.2343	24.5857
	GZ-2	104.167	35.62	20.46	158.333	47.14	21.6	158.333	35.372	20.332
	GZ-3	108.333	45.75	23.32	170.833	38.76	20.36	175	41.6767	21.6486
	GZ-4	91.6667	42.87	20.37	158.333	44.88	19.58	158.333	42.487	14.9388
	GZ-5	104.167	46.02	22.61	133.333	38.07	19.76	183.333	39.4739	23.5476
	GZ-6	195.833	34.82	19.4	91.6667	43.15	19.41	116.667	42.43	19.85
	GZ-7	179.167	35.52	22.3	104.167	48.21	14.76	116.667	41.94	19.36
	GZ-8	150	37.82	19.83	87.5	39.93	21.8	87.5	39.43	19.82
	GZ-9	158.333	36.62	23.24	104.167	43.93	17.31	87.5	44.3	19.28
	GZ-10	162.5	35.01	19.98	95.8333	53.6	18.95	70.8333	37.07	17.43
	GZ-11	125	50.09	16.46	116.667	37.05	16.77	120.833	46.33	23.89
	GZ-12	91.6667	49.43	18.39	100	41.92	15.87	120.833	44.15	22.71
	GZ-13	87.5	45.82	21.22	108.333	37.83	17.43	125	46.08	22.56
	GZ-14	79.1667	50.34	15.99	91.6667	39.2	21.56	91.6667	44.05	21.43
	GZ-15	104.167	51.57	16.89	100	42.32	21.61	79.1667	44.85	21.49
The abaxial leaf surfaces of grazed materials	GZ-1	54.1667	48.69	19.09	87.5	38.87	20.66	108.333	47.1458	19.699
	GZ-2	66.6667	47.47	16.21	70.8333	36.37	18.71	108.333	47.6522	21.3448
	GZ-3	58.3333	47.66	18.88	95.8333	39.61	22.18	125	50.9692	24.763
	GZ-4	58.3333	54.39	22.63	95.8333	37.77	21.37	112.5	49.6525	21.9018
	GZ-5	70.8333	46.87	21.37	108.333	42.28	19.71	125	41.2716	21.9524
	GZ-6	91.6667	38.61	16.96	87.5	38.87	20.66	116.667	42.14	21.44
	GZ-7	83.3333	37.87	21.4	70.8333	36.37	18.71	129.167	41.06	21.61
	GZ-8	91.6667	36.05	16.7	95.8333	39.61	22.18	95.8333	40.74	23.95
	GZ-9	95.8333	34.97	17.64	95.8333	37.77	21.37	125	48.37	22.22
	GZ-10	91.6667	37.63	19.57	108.333	42.28	19.71	125	42.48	21.03
	GZ-11	91.6667	43.49	20.48	91.6667	47.1	23.45	87.5	49.12	18.79
	GZ-12	100	44.37	19.84	91.6667	51.99	21.25	95.8333	47.22	23.12
	GZ-13	100	39.21	21.88	66.6667	48.51	23.96	70.8333	45.46	20.56
	GZ-14	83.3333	43.33	22.04	108.333	45.06	22.6	87.5	48.87	21.47
	GZ-15	116.667	47.86	24.57	104.167	49.48	22.59	91.6667	44.47	25.51
Note：NG, ungrazed; GZ, grazed. Outliers are where the data is not filled in.

## Sheet: Expression of genes
	Gene relative expression
Genes Treatments	ERL1	ER1	SAPK10	ER	ABCCL4	GNAT1	CYCP3L-1	ABCG5
NG	1.00028	1.00169	1.00825	1.00438	1.00252	1.01715	1.00133	1.0019
NG-SE	0.0288248	0.0720447	0.16165	0.113917	0.0876429	0.224633	0.0640414	0.0745724
GZ	0.0568931	0.331174	0.186527	0.371575	0.565283	0.408839	2.92917	0.278115
GZ-SE	0.000637993	0.03066	0.0128202	0.022296	0.0303401	0.0405954	0.216941	0.00997013
Sig	0	0.0001	0.0009	0.0007	0.0012	0.0099	0.0001	0.0001
